# Supplementary material for: Impact of Sleeve Gastrectomy on Fecal Microbiota in Individuals with Morbid Obesity
Source: MDPI journal article supplement (doi:10.3390/microorganisms11092353), 2023-09-20
Supplement: s1 [file s1]

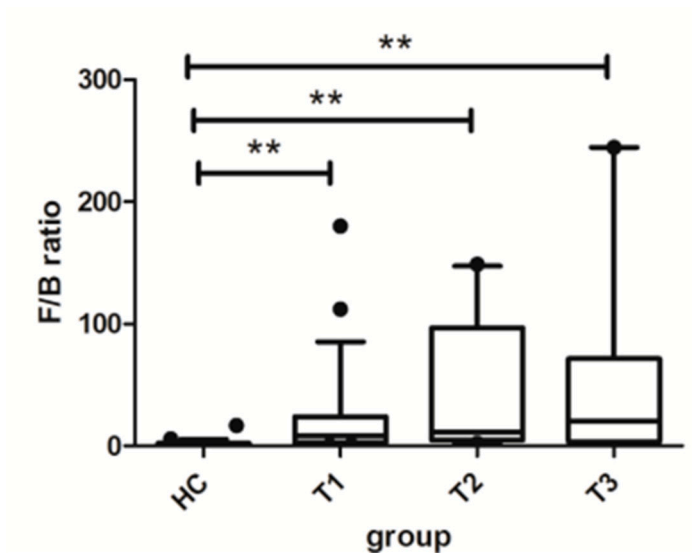

**Supplemental Figure S1.** The fecal Firmicutes/Bacteroidetes (F/B) ratio in healthy individuals (HC), individuals pre-SG (T1), individuals post-SG two months (T2) and six months (T3) post-GS. Data are presented as boxplots displaying medians with interquartile ranges. \*\* indicates  $p < 0.0001$

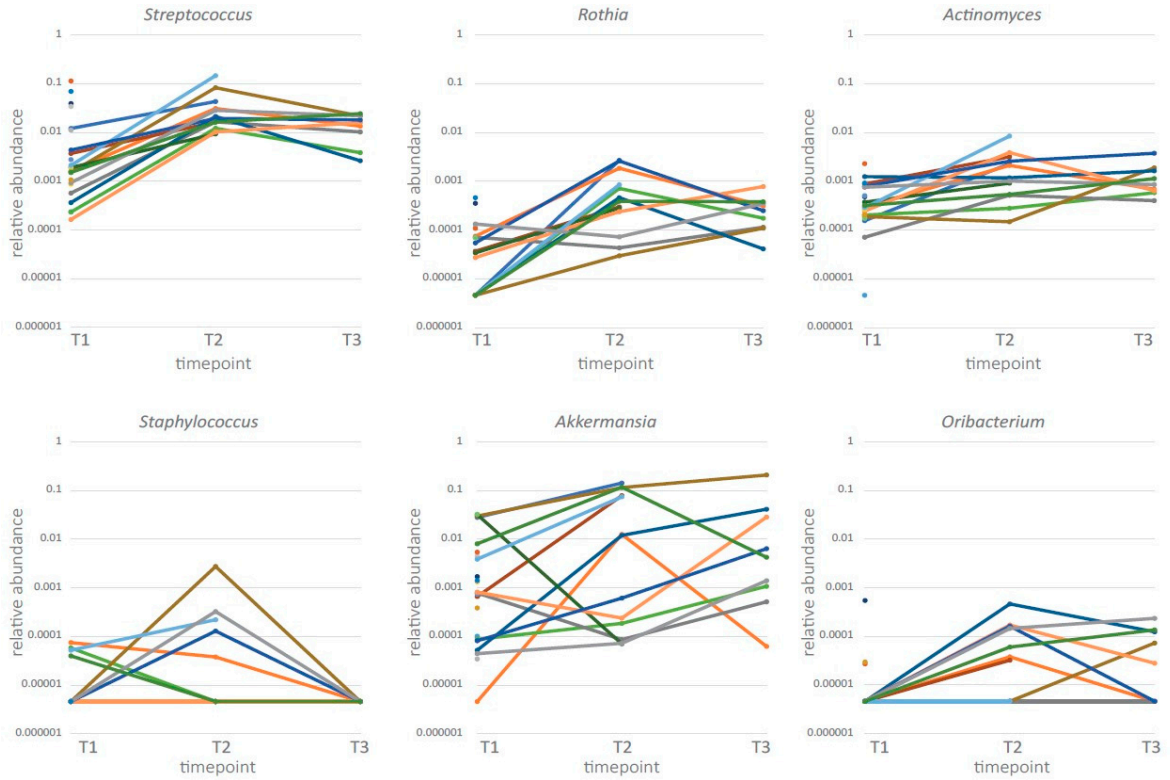

**Supplemental Figure S2.** Relative abundances of specific taxa at specified time points (pre-SG (T1), two (T2) and six (T3) months post-SG). Horizontal axis: "timepoint", vertical axis: "relative abundance".

versus T3 (6 months post-SG).

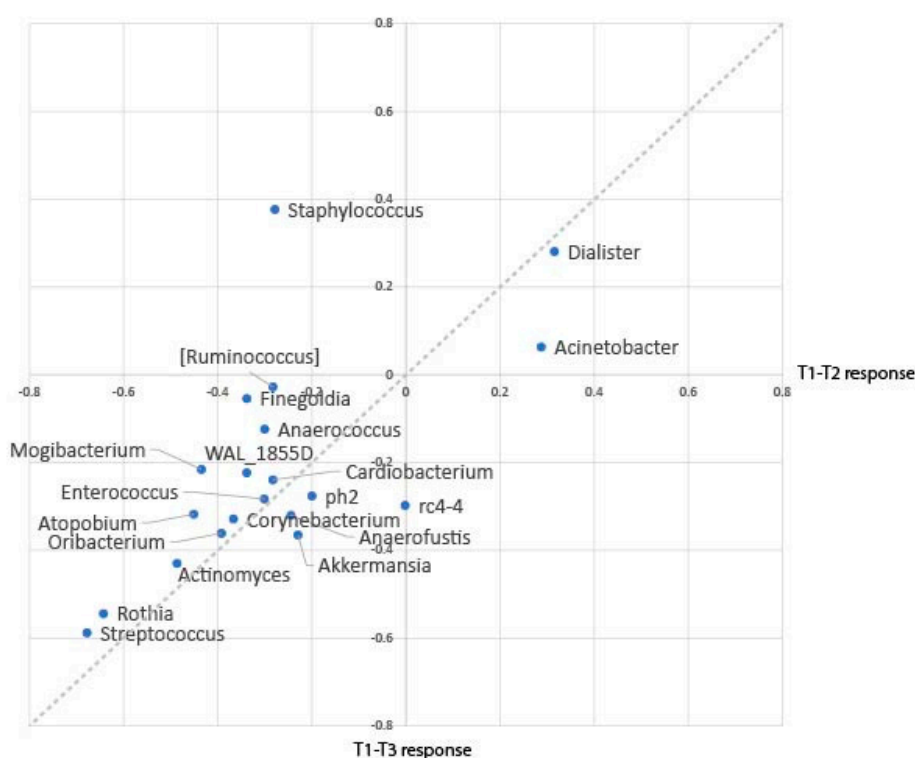

**Supplemental Figure S3.** Scatterplot based on the coordinates of the most important taxa according to the RDAs comparing samples T1 (pre-SG) versus T2 (2 months post-SG) and RDAs comparing samples T1 (pre-SG)

**Supplemental Table S1.** Taxa that contributed most to the separation between healthy individuals (HC) and obese individuals pre-SG (T1) according to their importance scores.

| Taxa important for HC vs T1 | importance score |
|-----------------------------|------------------|
| Odoribacter                 | 0.7567           |
| Bacteroides                 | 0.7068           |
| [Eubacterium]               | 0.6681           |
| Sutterella                  | 0.6581           |
| Lachnospira                 | 0.6467           |
| Butyricimonas               | 0.6310           |
| Actinomyces                 | 0.6228           |
| Dorea                       | 0.6014           |
| [Ruminococcus]              | 0.5914           |
| Parabacteroides             | 0.5664           |
| Blautia                     | 0.5059           |
| Peptococcus                 | 0.3183           |
| Anaerostipes                | 0.3045           |
| Paraprevotella              | 0.2640           |
| Bulleidia                   | 0.2634           |
| Mitsuokella                 | 0.2115           |
| Catenibacterium             | 0.1597           |
| Desulfovibrio               | 0.1356           |

|              |        |
|--------------|--------|
| [Prevotella] | 0.0412 |
| Prevotella   | 0.0235 |

Supplemental Table S2. Taxa that contributed most to the separation between obese individuals pre-SG (T1), two months (T2) and six months (T3) post-SG according to their importance scores.

| Taxa important for T1 vs T2 vs T3 | importance score |
|-----------------------------------|------------------|
| Streptococcus                     | 0.8789           |
| Rothia                            | 0.6062           |
| Oribacterium                      | 0.5109           |
| Actinomyces                       | 0.4825           |
| Corynebacterium                   | 0.3900           |
| Atopobium                         | 0.3757           |
| Dialister                         | 0.3535           |
| Mogibacterium                     | 0.3439           |
| Lactococcus                       | 0.3305           |
| Akkermansia                       | 0.3239           |
| [Ruminococcus]                    | 0.3101           |
| Finegoldia                        | 0.2277           |
| Selenomonas                       | 0.2121           |
| Staphylococcus                    | 0.1754           |
| Brevibacterium                    | 0.1513           |
| Campylobacter                     | 0.1500           |
| Bacillus                          | 0.1467           |
| Desulfomonile                     | 0.1448           |
| ph2                               | 0.1426           |
| LCP-26                            | 0.1387           |

Supplemental Table S3. Taxa that contributed most to the separation between obese individuals pre-SG (T1) and obese individuals two months (T2) post-SG.

| Taxa important for T1 vs T2 | importance score |
|-----------------------------|------------------|
| Streptococcus               | 0.6780           |
| Rothia                      | 0.6427           |
| Actinomyces                 | 0.4866           |
| Atopobium                   | 0.4513           |
| Mogibacterium               | 0.4347           |
| Oribacterium                | 0.3923           |
| Corynebacterium             | 0.3667           |
| WAL_1855D                   | 0.3384           |
| Finegoldia                  | 0.3382           |
| Dialister                   | 0.3156           |
| Enterococcus                | 0.3013           |
| Anaerococcus                | 0.3004           |
| Acinetobacter               | 0.2875           |
| [Ruminococcus]              | 0.2830           |
| Cardiobacterium             | 0.2828           |

|                |        |
|----------------|--------|
| Staphylococcus | 0.2786 |
| Fusobacterium  | 0.2750 |
| Varibaculum    | 0.2697 |
| Campylobacter  | 0.2670 |
| Porphyromonas  | 0.2604 |

**Supplemental Table S4. Taxa that contributed most to the separation between obese individuals pre-SG (T1) and obese individuals six months (T3) post-SG.**

| <b>Taxa important for T1 vs T3</b> | <b>importance score</b> |
|------------------------------------|-------------------------|
| Streptococcus                      | 0.5878                  |
| Rothia                             | 0.5444                  |
| Actinomyces                        | 0.4298                  |
| Staphylococcus                     | 0.3768                  |
| Akkermansia                        | 0.3652                  |
| Oribacterium                       | 0.3610                  |
| Brevibacterium                     | 0.3434                  |
| Corynebacterium                    | 0.3286                  |
| Anaerofustis                       | 0.3205                  |
| Atopobium                          | 0.3178                  |
| rc4-4                              | 0.2976                  |
| Enterococcus                       | 0.2828                  |
| Dialister                          | 0.2811                  |
| ph2                                | 0.2760                  |
| Campylobacter                      | 0.2683                  |
| Peptostreptococcus                 | 0.2594                  |
| Lactococcus                        | 0.2571                  |
| Bacillus                           | 0.2554                  |
| Pseudoramibacter_Eubacterium       | 0.2412                  |

**Supplemental Table S5. Confounder analysis of patient characteristics by means of RDA.**

| <b>Variable tested</b> | <b>Study group</b> | <b>Explained variation (%)</b> | <b>P-value</b> |
|------------------------|--------------------|--------------------------------|----------------|
| Diabetes               | T1                 | 3.2                            | 0.84           |
| Metformin              | T1                 | 5.4                            | 0.20           |
| Metformin              | T2                 | 8.3                            | 0.46           |
| Metformin              | T3                 | 15.4                           | 0.19           |
| Gender                 | HC                 | 2.9                            | 0.78           |
| Gender                 | T1                 | 4.0                            | 0.52           |
| Smoking                | T1                 | 8.3                            | 0.57           |
| Antidepressants        | T1                 | 6.0                            | 0.98           |
| PPI                    | T1                 | 4.1                            | 0.54           |

**Supplemental Table S6. Associations between host markers and the microbiota composition as examined by CCA.**

| Variable tested | Study group | Explained variation (%) | P-value |
|-----------------|-------------|-------------------------|---------|
| Calprotectin    | HC          | 6.2                     | 0.05    |
| Calprotectin    | T1          | 4.8                     | 0.29    |
| Calprotectin    | T2          | 6.9                     | 0.84    |
| Calprotectin    | T3          | 15.0                    | 0.17    |
| hsCRP           | HC          | 3.0                     | 0.63    |
| hsCRP           | T1          | 9.7                     | 0.002   |
| hsCRP           | T2          | 9.2                     | 0.27    |
| hsCRP           | T3          | 13.9                    | 0.26    |
| L/R ratio       | HC          | 3.6                     | 0.56    |
| L/R ratio       | T1          | 4.2                     | 0.47    |
| L/R ratio       | T2          | 9.4                     | 0.40    |
| L/R ratio       | T3          | 15.5                    | 0.10    |
| protein content | HC          | 4.2                     | 0.31    |
| protein content | T1          | 4.6                     | 0.37    |
| protein content | T2          | 11.2                    | 0.24    |
| protein content | T3          | 14.7                    | 0.26    |
| Hba1c           | T1          | 4.9                     | 0.62    |
| Hba1c           | T2          | 11.7                    | 0.22    |
| Hba1c           | T3          | 18.0                    | 0.07    |
| S/E ratio       | HC          | 1.4                     | 0.31    |
| S/E ratio       | T1          | 3.3                     | 0.89    |
| S/E ratio       | T2          | 6.2                     | 0.92    |
| S/E ratio       | T3          | 13.1                    | 0.36    |
| sucrose         | HC          | 3.7                     | 0.51    |
| sucrose         | T1          | 4.5                     | 0.48    |
| sucrose         | T2          | 9.9                     | 0.17    |
| sucrose         | T3          | 11.5                    | 0.68    |

**Supplemental Table S7. Pearson correlation coefficients (R) between changes in the three most strongly affected taxa by SG and markers of glycemic control, inflammatory and intestinal permeability.**

| Variable                              | Streptococcus |       |       | Actinomyces |       |       | Rothia |       |       |
|---------------------------------------|---------------|-------|-------|-------------|-------|-------|--------|-------|-------|
|                                       | R             | p     | FDR   | R           | p     | FDR   | R      | p     | FDR   |
| hba1c $\Delta$ T1- $\Delta$ T2        | 0.796         | 0.010 | 0.225 | -0.154      | 0.693 | 0.846 | -0.560 | 0.117 | 0.642 |
| hba1c $\Delta$ T1- $\Delta$ T3        | 0.526         | 0.180 | 0.692 | -0.520      | 0.186 | 0.692 | 0.307  | 0.460 | 0.764 |
| CRP $\Delta$ T1- $\Delta$ T2          | 0.314         | 0.300 | 0.705 | 0.021       | 0.946 | 0.968 | -0.152 | 0.620 | 0.801 |
| CRPc $\Delta$ T1- $\Delta$ T3         | 0.384         | 0.308 | 0.713 | -0.532      | 0.141 | 0.687 | 0.474  | 0.198 | 0.692 |
| calprotectin $\Delta$ T1- $\Delta$ T2 | 0.176         | 0.565 | 0.801 | 0.240       | 0.429 | 0.738 | 0.409  | 0.166 | 0.692 |
| calprotectin $\Delta$ T1- $\Delta$ T3 | 0.417         | 0.264 | 0.692 | -0.429      | 0.249 | 0.692 | 0.654  | 0.056 | 0.434 |
| sucrose $\Delta$ T1- $\Delta$ T2      | 0.158         | 0.625 | 0.720 | -0.343      | 0.276 | 0.434 | -0.584 | 0.046 | 0.738 |
| sucrose $\Delta$ T1- $\Delta$ T3      | 0.629         | 0.070 | 0.801 | -0.669      | 0.049 | 0.692 | 0.303  | 0.428 | 0.434 |
| SE $\Delta$ T1- $\Delta$ T2           | 0.183         | 0.549 | 0.801 | 0.091       | 0.767 | 0.855 | -0.112 | 0.717 | 0.852 |

|                                             |        |       |       |       |       |       |        |       |       |
|---------------------------------------------|--------|-------|-------|-------|-------|-------|--------|-------|-------|
| <b>SE <math>\Delta T1-\Delta T3</math></b>  | 0.007  | 0.986 | 0.986 | 0.298 | 0.436 | 0.738 | -0.109 | 0.779 | 0.855 |
| <b>LR <math>\Delta T1-\Delta T2</math></b>  | 0.285  | 0.369 | 0.738 | 0.354 | 0.260 | 0.692 | 0.161  | 0.617 | 0.801 |
| <b>LR <math>\Delta T1-\Delta T3</math></b>  | -0.318 | 0.405 | 0.738 | 0.236 | 0.541 | 0.801 | -0.112 | 0.774 | 0.855 |
| <b>BMI <math>\Delta T1-\Delta T2</math></b> | 0.376  | 0.229 | 0.801 | 0.161 | 0.617 | 0.924 | -0.297 | 0.349 | 0.801 |
| <b>BMI <math>\Delta T1-\Delta T3</math></b> | 0.214  | 0.580 | 0.692 | 0.069 | 0.861 | 0.801 | -0.220 | 0.569 | 0.732 |
